# Supplementary material
Source: MDPI journal article supplement (https://www.mdpi.com/2073-4352/12/5/734)
Supplement: s1 [file s1]

Article

# Facile Two-Step Deposition of Calcium Oxalate Film on Dolomite to Improve Acid Rain Resistance

Jianrui Zha <sup>1</sup>, Yaoqi Gu <sup>1</sup>, Shuya Wei <sup>1,\*</sup>, Huarui Han <sup>2</sup>, Feng Wang <sup>1</sup> and Qinglin Ma <sup>3,\*</sup>

<sup>1</sup> Institute of Cultural Heritage and History of Science & Technology, University of Science and Technology Beijing, Beijing 100083, China; zha6561688@163.com (J.Z.); xiaogugubait@163.com (Y.G.); wangfeng1911@126.com (F.W.)

<sup>2</sup> Institute of Archaeology, Chinese Academy of Social Sciences, Beijing 100101, China; hanhr1988@163.com

<sup>3</sup> International Joint Research Laboratory of Environmental and Social Archaeology, Shandong University, Qingdao 266237, China

\* Correspondence: sywei66@hotmail.com (S.W.); qinglinma226@126.com (Q.M.)

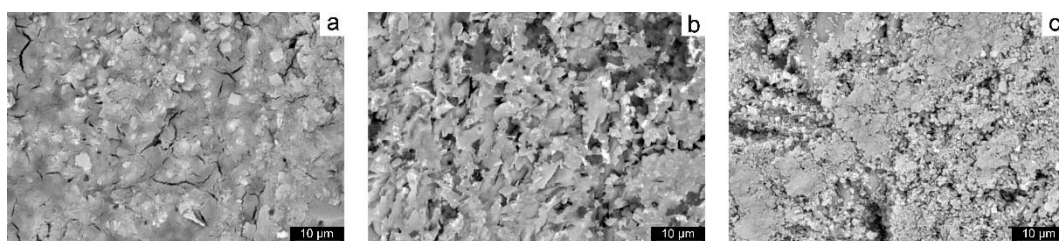

**Figure S1.** The SEM of dolomite after different composition solution B treatment (a) calcium acetate + dimethyl oxalate, (b) calcium acetate + dimethyl oxalate + nitric acid, (c) calcium acetate + dimethyl oxalate + sodium hydroxide.

**Citation:** Zha, J.; Gu, Y.; Wei, S.; Han, H.; Wang, F.; Ma, Q. Facile Two-Step Deposition of Calcium Oxalate Film on Dolomite to Improve Acid Rain Resistance. *Crystals* **2022**, *12*, 734. <https://doi.org/10.3390/cryst12050734>

Academic Editors: Dongzhu Lu, Quantong Jiang and Kuikui Wang

Received: 6 May 2022

Accepted: 18 May 2022

Published: 20 May 2022

**Publisher's Note:** MDPI stays neutral with regard to jurisdictional claims in published maps and institutional affiliations.

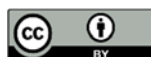

**Copyright:** © 2022 by the authors. Licensee MDPI, Basel, Switzerland. This article is an open access article distributed under the terms and conditions of the Creative Commons Attribution (CC BY) license (<https://creativecommons.org/licenses/by/4.0/>).

The Figure s1 illustrated the influence of solution B composition, which lead to crack or patch on the calcium oxalate film. These results are likely to be related to the different hydrolysis process of dimethyl oxalate.

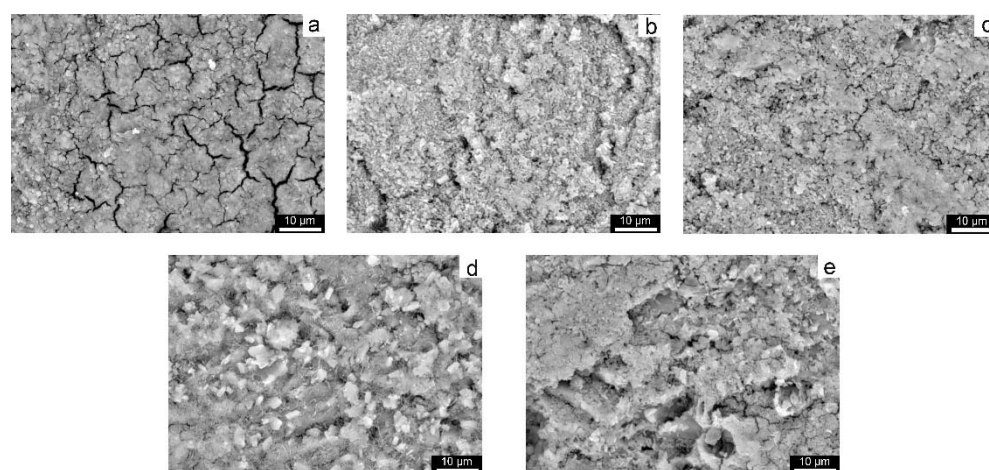

**Figure S2.** The SEM of dolomite after different additive content solution B treatment (a) 0.0001mol, (b) 0.0002mol, (c) 0.0003mol, (d) 0.0004mol, (e) 0.0005mol.

To investigated the influence of different additive content solution B on film morphology, here we prepared a series of solution with different NaOH content (0.0001–0.0005mol). With the content increase, the crack first decreased and then increase. The

results demonstrate that the NaOH has a positive correlation effect on the film completeness.

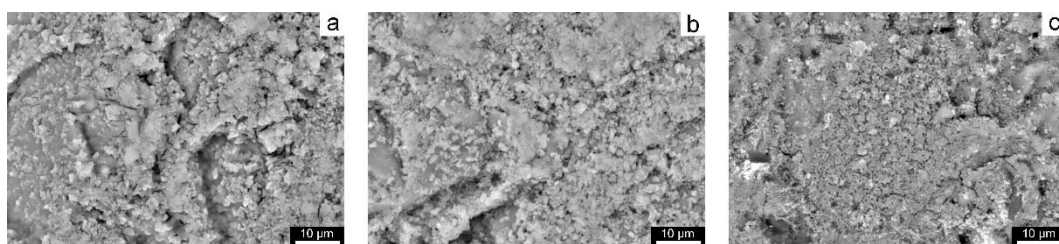

**Figure S3.** The SEM of dolomite after solution B treatment (a) spray, (b) poultice, (c) brush.

It showed the morphology of CA specimen after different treatment method.

The results demonstrated that spray treatment method can form a coverage layer on the roughness surface.

**Table S1.** Chromatic value of sample.

| Type          | L     | a     | b    | c    |
|---------------|-------|-------|------|------|
| UT            | 92.53 | -0.54 | 0.08 | 0.55 |
|               | 92.42 | -0.59 | 0    | 0.59 |
|               | 90.88 | -0.64 | 0.2  | 0.67 |
|               | 90.94 | -0.69 | 0.09 | 0.7  |
|               | 91.83 | -0.62 | 0.1  | 0.63 |
| AO            | 91.08 | 0     | 0.97 | 0.97 |
|               | 92.2  | 0     | 0.87 | 0.87 |
|               | 89.6  | -0.51 | 0.09 | 0.52 |
|               | 88.09 | -0.55 | 0.54 | 0.77 |
|               | 89.58 | -0.34 | 1.13 | 1.18 |
| 0.02 mol/L CA | 92.99 | -0.42 | 0.78 | 0.89 |
|               | 93.56 | -0.3  | 0.77 | 0.83 |
|               | 92.21 | -0.34 | 1.02 | 1.08 |
|               | 90.13 | -0.36 | 1.08 | 1.14 |
|               | 92.93 | -0.39 | 0.88 | 0.96 |

To get a reliable test result, for each sample five area was analyzed.
